# Supplementary material for: Controlling polyurethane foam flammability and mechanical behaviour by tailoring the composition of clay-based multilayer nanocoatings
Source: Royal Society of Chemistry journal article supplement (doi:10.1039/c3ta11936j), 2013-01-01
Supplement: c3ta11936j.pdf [file c3ta11936j.pdf]

## Supplementary information

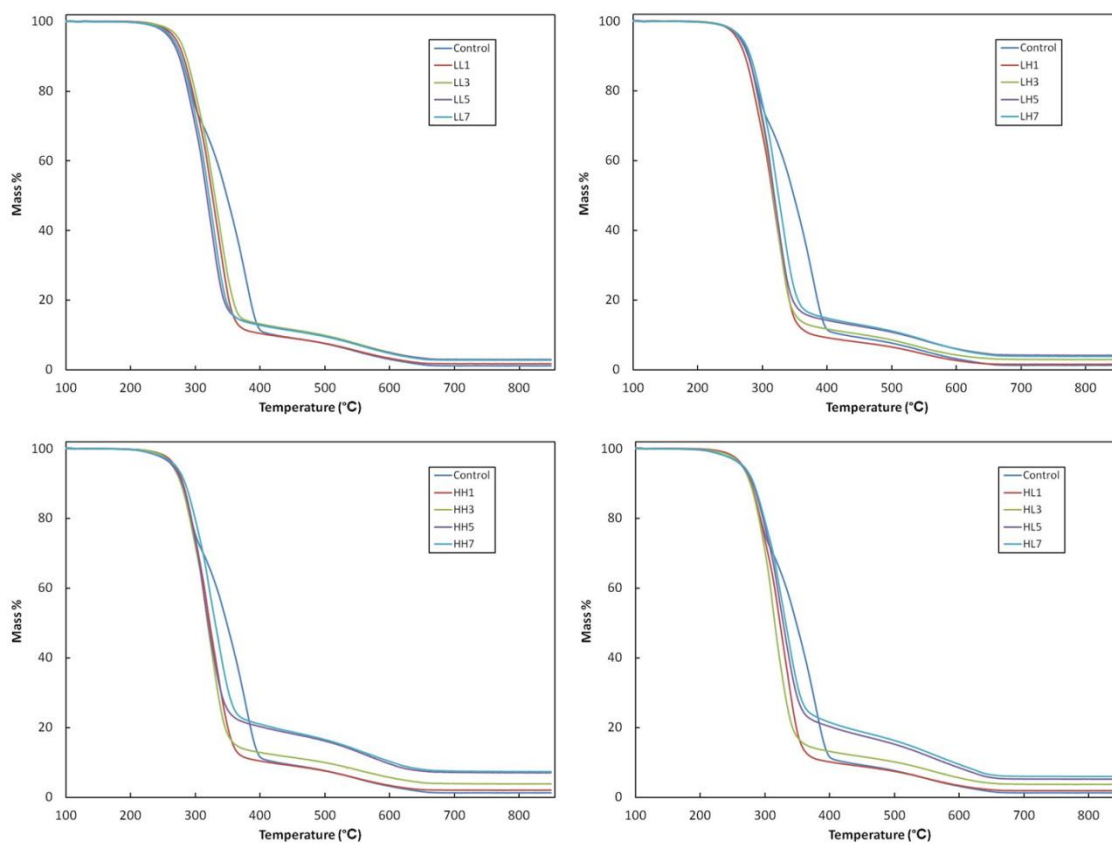

S1. Thermogravimetric analysis data of control and (a) LL 1 to 7, (b) LH1 to 7, (c) HH1 to 7 and (d) HL1 to 7 coated foam under air atmosphere, 20 °C/min.
